# Supplementary material for: Association of Coronary Plaque With Low-Density Lipoprotein Cholesterol Levels and Rates of Cardiovascular Disease Events Among Symptomatic Adults
Source: PubMed Central journal article supplement (PMC8837910; doi:10.1001/jamanetworkopen.2021.48139), 2022-02-11

## Supplementary Online Content

Mortensen MB, Caínzos-Achirica M, Steffensen FH, et al. Association of coronary plaque with low-density lipoprotein cholesterol levels and rates of cardiovascular disease events among symptomatic adults. *JAMA Netw Open*. 2022;5(2):e2148139. doi:10.1001/jamanetworkopen.2021.48139

**eTable 1.** Event Rates per 1000 Person-Years of a Myocardial Infarction, Stroke, and All-Cause Death Stratified by Baseline LDL-C Levels, CAC Scores, and CCTA Plaque Burden

**eTable 2.** Hazard Ratio for Having No Coronary Artery Calcium vs Having Coronary Artery Calcium Score >0

**eTable 3.** Event Rates per 1000 Person-Years of Myocardial Infarction and Stroke (Excluding All-Cause Death From the Study End Point), Overall and by Baseline LDL-C Levels, CAC Scores, and CCTA Plaque Burden

**eTable 4.** Event Rates per 1000 Person-Years of Myocardial Infarction, Stroke, and All-Cause Death in Patients not Using Statin Therapy at Baseline Examination (Excluding Statin Users at Baseline), Overall and by Baseline LDL-C Levels, CAC Scores, and CCTA Plaque Burden

**eFigure 1.** Cardiovascular and All-Cause Death Event Rates per 1000 Person-Years Stratified by Absence vs Presence of Detectable Atherosclerotic Plaque

**eFigure 2.** Kaplan-Meier Cumulative Incidence Function for the Occurrence of Myocardial Infarction and Stroke (Excluding All-Cause Death From Study End Point) by Baseline LDL-C Levels and CAC Burden

**eFigure 3.** Myocardial Infarction and Stroke Event Rates per 1000 Person-Years Stratified by Coronary Artery Calcium Score and Low-Density Lipoprotein Cholesterol Levels

This supplementary material has been provided by the authors to give readers additional information about their work.

**eTable 1. Event Rates per 1000 Person-Years of a Myocardial Infarction, Stroke, and All-Cause Death Stratified by Baseline LDL-C Levels, CAC Scores, and CCTA Plaque Burden**

|                                | CCTA           |                  |                  |
|--------------------------------|----------------|------------------|------------------|
|                                | No plaque      | Non obstructive  | Obstructive      |
| <b>Overall (N=23,143)</b>      |                |                  |                  |
| CAC=0                          | 6.1 (5.5-6.9)  | 6.3 (4.1-9.9)    | 8.0 (5.3-11.8)   |
| CAC 1-99                       | -              | 9.8 (8.5-11.3)   | 15.3 (12.6-18.8) |
| CAC ≥100                       | -              | 21.1 (18.0-24.7) | 22.3 (19.7-25.4) |
| <b>LDL-C &lt;2.0 (N=2,430)</b> |                |                  |                  |
| CAC=0                          | 9.8 (7.3-13.1) | 7.5 (1.9-31.0)   | 21.2 (8.8-51.0)  |
| CAC 1-99                       | -              | 14.4 (10.0-20.7) | 18.7 (10.0-34.7) |
| CAC ≥100                       | -              | 30.4 (21.3-43.5) | 29.1 (21.1-40.2) |
| <b>LDL-C 2.0-2.9 (N=7,964)</b> |                |                  |                  |
| CAC=0                          | 6.2 (5.1-7.5)  | 5.6 (2.3-13.5)   | 6.4 (3.1-13.5)   |
| CAC 1-99                       | -              | 9.6 (7.5-12.2)   | 12.1 (8.2-18.0)  |
| CAC ≥100                       | -              | 23.7 (18.3-30.6) | 25.0 (20.3-30.7) |
| <b>LDL-C 3.0-3.9 (N=8,409)</b> |                |                  |                  |
| CAC=0                          | 5.4 (4.4-6.6)  | 6.5 (3.2-12.9)   | 4.7 (2.1-10.6)   |
| CAC 1-99                       | -              | 9.2 (7.2-11.6)   | 16.7 (12.0-23.2) |
| CAC ≥100                       | -              | 19.4 (14.7-25.5) | 18.5 (14.5-23.4) |
| <b>LDL-C 4.0-4.9 (N=3,392)</b> |                |                  |                  |
| CAC=0                          | 5.7 (4.1-7.8)  | 7.3 (2.7-19.4)   | 10.3 (3.9-27.6)  |
| CAC 1-99                       | -              | 7.1 (4.7-10.6)   | 15.7 (9.9-24.9)  |

|                                         |                |                  |                  |
|-----------------------------------------|----------------|------------------|------------------|
| CAC $\geq$ 100                          | -              | 11.6 (6.6-20.4)  | 19.9 (14.1-28.0) |
| <b>LDL-C <math>\geq</math>5 (N=948)</b> |                |                  |                  |
| CAC=0                                   | 6.0 (3.1-11.6) | 4.8 (0.7-34.2)   | 17.7 (5.7-54.9)  |
| CAC 1-99                                | -              | 17.5 (10.2-30.1) | 19.5 (9.7-38.9)  |
| CAC $\geq$ 100                          | -              | 18.6 (7.7-44.6)  | 22.7 (12.9-40.0) |

The main study endpoint combined myocardial infarction, ischemic stroke and all-cause death. Results are presented as incidence rates (per 1,000 person-years)

Abbreviations: CAC = coronary artery calcium; CCTA = coronary computed tomography angiography; LDL-C = low-density lipoprotein cholesterol

**eTable 2. Hazard Ratio for Having No Coronary Artery Calcium vs Having Coronary Artery Calcium Score >0**

|                            | <b>Hazard ratio for cardiovascular disease and death (95% CI)*</b> |                  |                    |                    |                    |                  |
|----------------------------|--------------------------------------------------------------------|------------------|--------------------|--------------------|--------------------|------------------|
|                            | <b>Overall</b>                                                     | <b>LDL&lt;2</b>  | <b>LDL 2.0-2.9</b> | <b>LDL 3.0-3.9</b> | <b>LDL 4.0-4.9</b> | <b>LDL≥5.0</b>   |
| <b>CAC 0 vs. CAC &gt;0</b> | 0.74 (0.63-0.90)                                                   | 0.78 (0.52-1.14) | 0.78 (0.64-0.99)   | 0.67 (0.54-0.93)   | 0.82 (0.61-1.05)   | 0.49 (0.25-0.95) |

\*Adjusted by age, sex, smoking status, statin use at baseline, aspirin use at baseline and post-CCTA statin use.

**eTable 3. Event Rates per 1000 Person-YEARS of Myocardial Infarction and Stroke (Excluding All-Cause Death From the Study End Point), Overall and by Baseline LDL-C Levels, CAC Scores, and CCTA Plaque Burden**

|                                | CCTA          |                 |                 |
|--------------------------------|---------------|-----------------|-----------------|
|                                | No plaque     | Non obstructive | Obstructive     |
| <b>Overall (N=23,143)</b>      |               |                 |                 |
| CAC=0                          | 3.3 (2.8-3.8) | 4.5 (2.6-7.5)   | 4.5 (2.6-7.5)   |
| CAC 1-99                       | -             | 4.4 (3.5-5.4)   | 9.6 (7.4-12.4)  |
| CAC >100                       | -             | 8.8 (6.9-11.2)  | 11.2 (9.3-13.4) |
| <b>LDL-C &lt;2.0 (N=2,430)</b> |               |                 |                 |
| CAC=0                          | 4.8 (3.2-7.3) | 7.8 (1.9-31.0)  | 8.5 (2.1-33.9)  |
| CAC 1-99                       | -             | 6.0 (3.4-10.5)  | 11.2 (5.0-24.9) |
| CAC >100                       | -             | 10.1 (5.5-18.8) | 14.2 (8.9-22.5) |
| <b>LDL-C 2.0-2.9 (N=7,964)</b> |               |                 |                 |
| CAC=0                          | 3.2 (2.5-4.2) | 5.6 (2.3-13.5)  | 2.8 (0.9-8.6)   |
| CAC 1-99                       | -             | 4.3 (3.0-6.2)   | 6.8 (4.0-11.5)  |
| CAC >100                       | -             | 9.3 (6.2-14.2)  | 12.2 (9.1-16.4) |
| <b>LDL-C 3.0-3.9 (N=8,409)</b> |               |                 |                 |
| CAC=0                          | 3.2 (2.4-4.1) | 4.0 (1.7-9.7)   | 3.2 (1.2-8.4)   |
| CAC 1-99                       | -             | 3.5 (2.4-5.1)   | 9.5 (6.1-14.8)  |
| CAC >100                       | -             | 8.7 (5.8-13.1)  | 8.7 (6.1-12.3)  |
| <b>LDL-C 4.0-4.9 (N=3,392)</b> |               |                 |                 |
| CAC=0                          | 2.5 (1.5-4.0) | 3.5 (0.9-13.8)  | 7.4 (2.4-22.9)  |
| CAC 1-99                       | -             | 3.9 (2.3-6.7)   | 11.6 (6.9-19.6) |
| CAC >100                       | -             | 3.8 (1.4-10.1)  | 12.1 (7.9-18.6) |

|                                         |               |                 |                 |
|-----------------------------------------|---------------|-----------------|-----------------|
| <b>LDL-C <math>\geq</math>5 (N=948)</b> |               |                 |                 |
| CAC=0                                   | 4.0 (1.8-8.9) | 0               | 11.8 (3.0-47.2) |
| CAC 1-99                                | -             | 12.1 (6.3-23.3) | 14.6 (6.5-32.5) |
| CAC >100                                | -             | 18.6 (7.7-44.6) | 11.3 (5.1-25.3) |

The secondary study endpoint included myocardial infarction and ischemic stroke. Results are presented as incidence rates (per 1,000 person-years)

Abbreviations: CAC = coronary artery calcium; CCTA = coronary computed tomography angiography; LDL-C = low-density lipoprotein cholesterol

**eTable 4. Event Rates per 1000 Person-Years of Myocardial Infarction, Stroke, and All-Cause Death in Patients not Using Statin Therapy at Baseline Examination (Excluding Statin Users at Baseline), Overall and by Baseline LDL-C Levels, CAC Scores, and CCTA Plaque Burden**

|                                | CCTA           |                  |                   |
|--------------------------------|----------------|------------------|-------------------|
|                                | No plaque      | Non obstructive  | Obstructive       |
| <b>Overall (N=23,143)</b>      |                |                  |                   |
| CAC=0                          | 5.7 (4.9-6.5)  | 6.0 (3.4-10.5)   | 3.9 (1.9-7.6)     |
| CAC 1-99                       | -              | 8.7 (6.7-11.3)   | 15.3 (12.6-18.8)  |
| CAC ≥100                       | -              | 31.2 (19.7-49.6) | 29.11 (21.1-40.1) |
| <b>LDL-C &lt;2.0 (N=2,430)</b> |                |                  |                   |
| CAC=0                          | 9.1 (5.9-13.9) | 23.7 (5.9-95.2)  | 18.2 (2.6-129.6)  |
| CAC 1-99                       | -              | 12.4 (6.2-24.8)  | 18.7 (10.0-34.7)  |
| CAC ≥100                       | -              | 30.4 (21.3-43.5) | 29.1 (20.3-40.7)  |
| <b>LDL-C 2.0-2.9 (N=7,964)</b> |                |                  |                   |
| CAC=0                          | 5.6 (4.4-7.0)  | 3.9 (0.9-15.7)   | 2.7 (0.7-10.9)    |
| CAC 1-99                       | -              | 9.0 (5.0-12.6)   | 12.1 (8.2-18.0)   |
| CAC ≥100                       | -              | 24.1 (17.5-33.3) | 25.0 (20.3-30.7)  |
| <b>LDL-C 3.0-3.9 (N=8,409)</b> |                |                  |                   |
| CAC=0                          | 5.4 (4.3-6.6)  | 6.3 (2.8-13.9)   | 3.1 (1.0-9.4)     |
| CAC 1-99                       | -              | 8.6 (5.5-13.2)   | 16.6 (12.0-23.2)  |
| CAC ≥100                       | -              | 19.3 (13.7-27.3) | 18.4 (14.5-23.4)  |
| <b>LDL-C 4.0-4.9 (N=3,392)</b> |                |                  |                   |
| CAC=0                          | 5.7 (3.9-8.3)  | 3.0 (0.4-19.4)   | 4.2 (0.6-29.6)    |
| CAC 1-99                       | -              | 6.9 (3.5-13.9)   | 15.7 (9.8-24.7)   |

|                                         |                |                 |                  |
|-----------------------------------------|----------------|-----------------|------------------|
| CAC $\geq$ 100                          | -              | 9.2 (3.8-22.1)  | 19.9 (13.2-28.0) |
| <b>LDL-C <math>\geq</math>5 (N=948)</b> |                |                 |                  |
| CAC=0                                   | 4.1 (4.1-12.6) | 5.0 (1.7-85.1)  | 13.5 (1.9-96.7)  |
| CAC 1-99                                | -              | 17.7 (6.6-42.7) | 19.5 (9.7-38.9)  |
| CAC $\geq$ 100                          | -              | 24.2 (9.1-64.3) | 22.4 (12.1-40.0) |

The secondary study endpoint included myocardial infarction and ischemic stroke. Results are presented as incidence rates (per 1,000 person-years)

Abbreviations: CAC = coronary artery calcium; CCTA = coronary computed tomography angiography; LDL-C = low-density lipoprotein cholesterol.



**eFigure 1. Cardiovascular and All-Cause Death Event Rates per 1000 Person-Years Stratified by Absence vs Presence of Detectable Atherosclerotic Plaque**

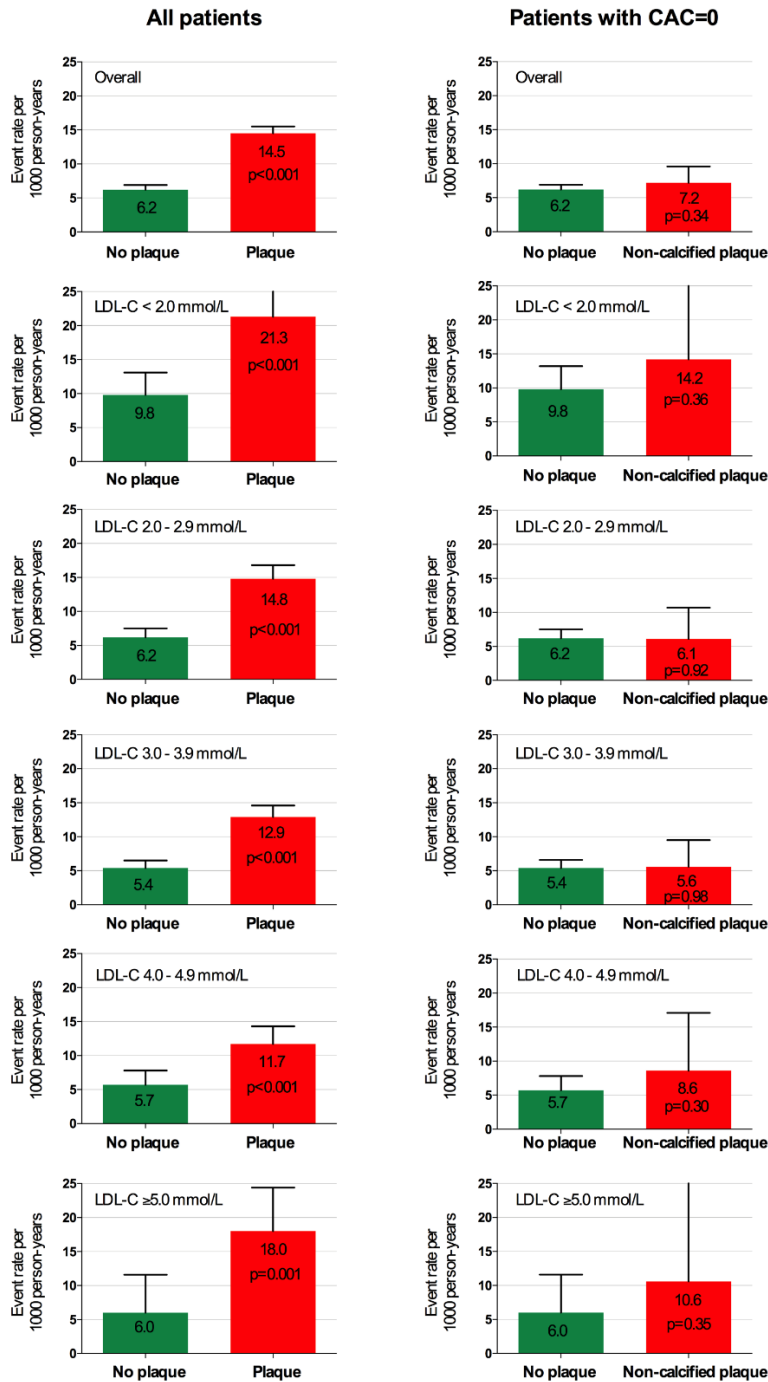

**eFigure 2.** Kaplan-Meier Cumulative Incidence Function for the Occurrence of Myocardial Infarction and Stroke (Excluding All-Cause Death From Study End Point) by Baseline LDL-C Levels and CAC Burden

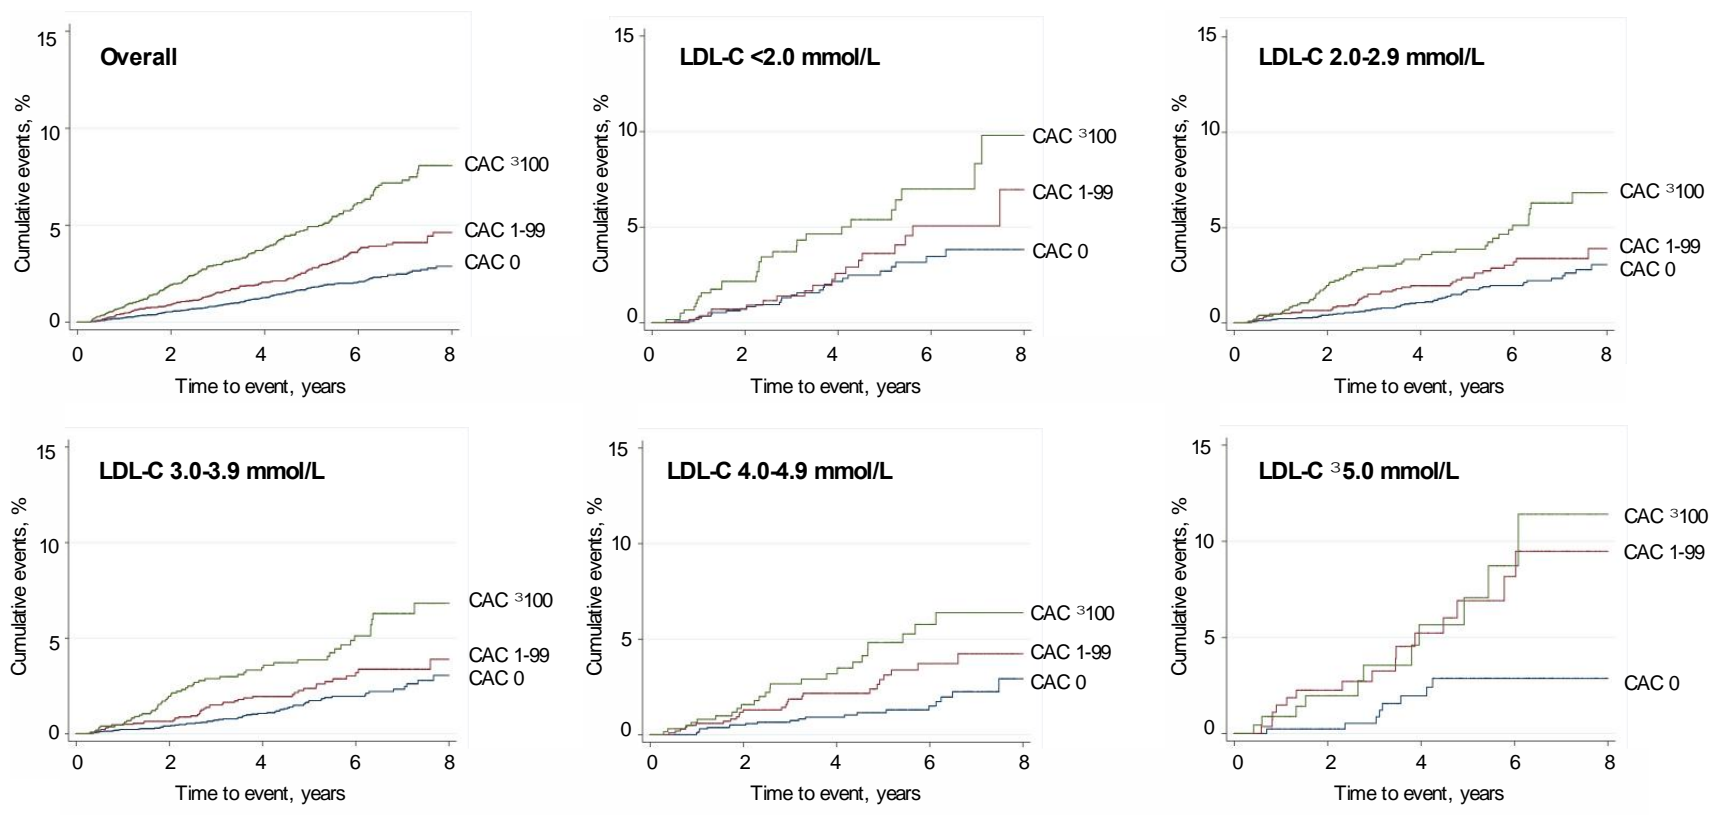

The secondary study endpoint included myocardial infarction and ischemic stroke.

Abbreviations: CAC = coronary artery calcium; LDL-C = low-density lipoprotein cholesterol

**eFigure 3. Myocardial Infarction and Stroke Event Rates per 1000 Person-Years Stratified by Coronary Artery Calcium Score and Low-Density Lipoprotein Cholesterol Levels**

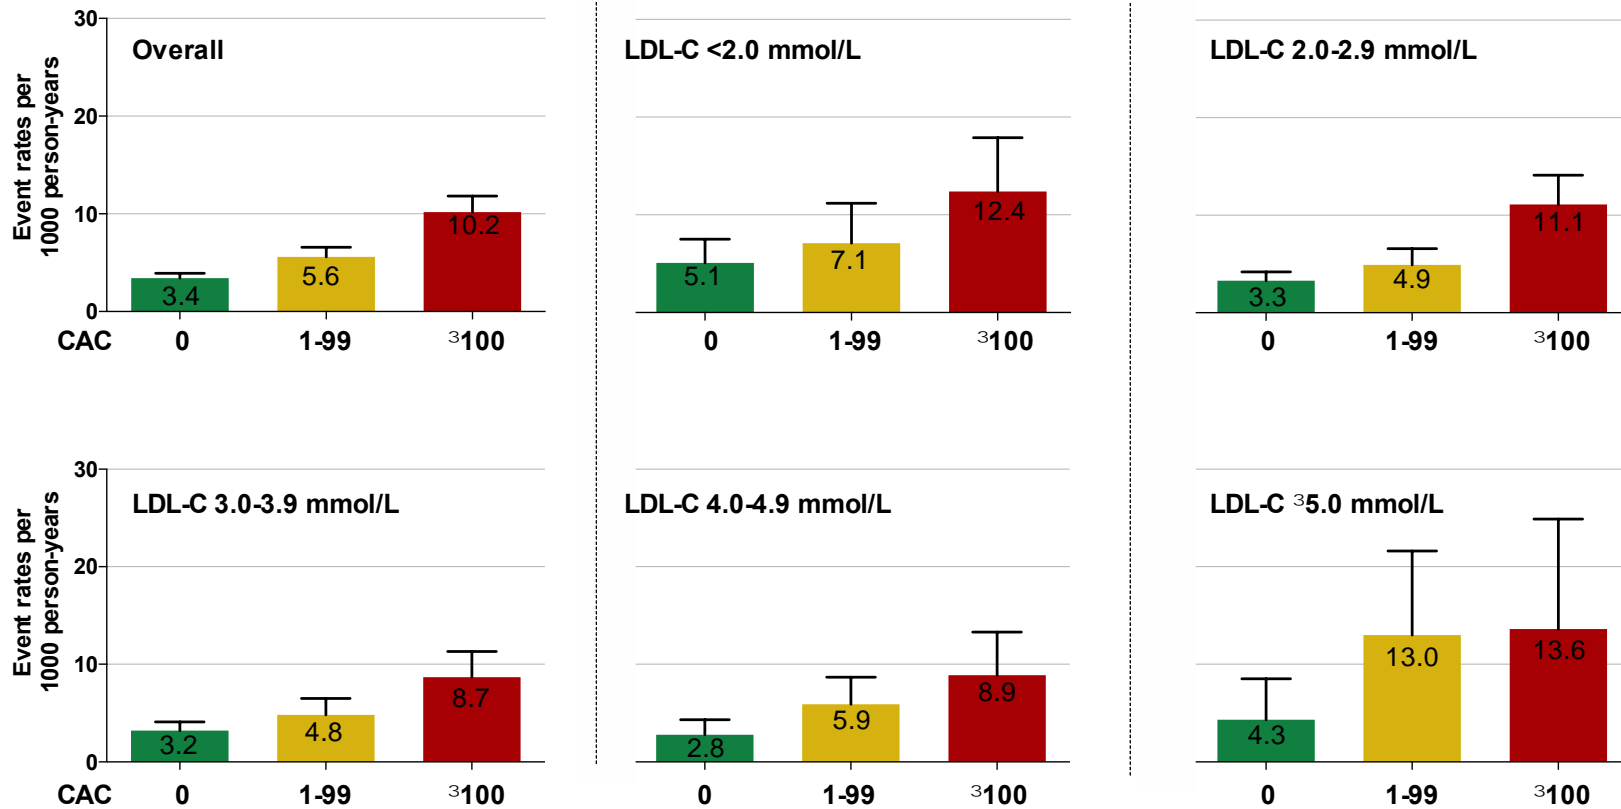

Supplement: jamanetwopen-e2148139-s001.pdf [file jamanetwopen-e2148139-s001.pdf]
